# Supplementary material for: Exploring the Effect of Asymmetric Mitochondrial DNA Introgression on Estimating Niche Divergence in Morphologically Cryptic Species
Source: PLoS One. 2014 Apr 17;9(4):e95504. doi: 10.1371/journal.pone.0095504 (PMC3990694; doi:10.1371/journal.pone.0095504)
Supplement: Dataset S1 — Locality data partitioned according to nuDNA composition and mtDNA type. (XLS) [file pone.0095504.s001.xls]

## Sheet: Dataset S1
Dataset S1. Locality data partitioned according to nuDNA composition and mtDNA type.
				nuclear DNA			mitochondrial DNA*			nuclear and mitochondrial DNA*
Locality	Latitude	Longitude	Reference	T. macedonicus	T. ivanbureschi	candidate sp.	T. macedonicus	T. ivanbureschi	candidate sp.	Range section A	Range section B	Range section C	Range section D	Range section E
Albania: Klos	41.5	20.095	15	x			x			x
Albania: Bajram Curri	42.35	20.083	15	x			x			x
Albania: Bajzë	42.303	19.441	1	x			x			x
Albania: Bejar	40.429	19.85	1	x			x			x
Albania: Belsh	40.983	19.883	15	x			x			x
Albania: Bilisht	40.623	20.987	15	x			x			x
Albania: Bruc	41.692	20.053	15	x			x			x
Albania: Bёrxullё	41.383	19.7	15	x			x			x
Albania: Cajё	41.883	20.5	15	x			x			x
Albania: Dhrovian	39.887	20.217	15	x			x			x
Albania: Divjakё	40.991	19.524	15	x			x			x
Albania: Fllakё	41.369	19.506	15	x			x			x
Albania: Fushë-Krujë	41.529	19.682	1	x			x			x
Albania: Gjerbёs	40.624	20.251	15	x			x			x
Albania: Gosё	41.089	19.636	15	x			x			x
Albania: Gracen	41.157	19.949	1	x			x			x
Albania: Kakrukё	40.538	20.134	15	x			x			x
Albania: Kala e Dodёs	41.817	20.433	15	x			x			x
Albania: Kavajë	41.168	19.556	1	x			x			x
Albania: Kolsh	42.072	20.326	1	x			x			x
Albania: Konispol	39.655	20.176	15	x			x			x
Albania: Koplik	42.197	19.451	1	x			x			x
Albania: Korab Mts.	41.682	20.521	1	x			x			x
Albania: Krutje	40.867	19.717	15	x			x			x
Albania: Kuç	40.171	19.837	15	x			x			x
Albania: Kulme	41.771	19.816	15	x			x			x
Albania: Labinot-Mal	41.201	20.151	15	x			x			x
Albania: Leskovik	40.151	20.592	15	x			x			x
Albania: Libohovё	40.025	20.258	15	x			x			x
Albania: Librazhd	41.174	20.309	15	x			x			x
Albania: Lukovё	39.989	19.908	15	x			x			x
Albania: Lushnjë	41	19.664	1	x			x			x
Albania: Maliq	40.704	20.693	15	x			x			x
Albania: Manёz	41.433	19.583	15	x			x			x
Albania: Mbrostar	40.752	19.574	15	x			x			x
Albania: Mifol	40.604	19.487	15	x			x			x
Albania: Ndroq	41.267	19.65	15	x			x			x
Albania: Pogradec	40.931	20.64	1	x			x			x
Albania: Progěr	40.7	20.933	2	x			x			x
Albania: Pёrrenjas	41.07	20.543	15	x			x			x
Albania: Sauk	41.288	19.82	15	x			x			x
Albania: Selcё	42.507	19.123	15	x			x			x
Albania: Shishtavec	41.983	20.6	15	x			x			x
Albania: Sopik	39.782	20.07	1	x			x			x
Albania: Spille	41.09	19.467	15	x			x			x
Albania: Tale	41.682	19.614	15	x			x			x
Albania: Theth	42.405	19.764	15	x			x			x
Albania: Trebeshinë Mts.	40.348	20.102	1	x			x			x
Albania: Vau Dejёs	42	19.633	15	x			x			x
Albania: Velipojё	41.865	19.43	15	x			x			x
Albania: Vermosh	42.592	19.688	15	x			x			x
Albania: Vithkuq	40.522	20.576	15	x			x			x
Bosnia and Herzegovina: Donja – Gornja Čadjavica	44.8	19.033	1	x				x			x
Bosnia and Herzegovina: Dubrava	44.533	18.667	7	x				x			x
Bosnia and Herzegovina: Gornja Čadjavica	44.75	19.083	1	x				x			x
Bosnia and Herzegovina: Sarajevo	43.867	18.433	16	x				x			x
Bosnia and Herzegovina: Tavna Monastire	44.6	19.067	1	x				x			x
Bosnia and Herzegovina: Visegrad	43.783	19.333	1	x				x			x
Bulgaria: Alepu	42.348	27.714	1		x			x				x
Bulgaria: Alexandrovo	42.601	25.093	1		x			x				x
Bulgaria: Bankya	42.717	23.133	2		x			x				x
Bulgaria: Bata	42.463	24.198	1		x			x				x
Bulgaria: Belopoltsi	41.524	25.796	1		x			x				x
Bulgaria: Bivoliyane	41.57	25.5113	1		x			x				x
Bulgaria: Bolata	43.384	28.471	1		x			x				x
Bulgaria: Boyana Lake	42.636	23.27	1		x			x				x
Bulgaria: Byaga	42.079	24.393	1		x			x				x
Bulgaria: Chukovo	41.489	25.457	1		x			x				x
Bulgaria: Dendrariuma	42.628	23.228	1		x			x				x
Bulgaria: Dobrich	43.567	27.833	3		x			x				x
Bulgaria: Dolna Dikanya	42.45	23.117	2		x			x				x
Bulgaria: Dolni Koriten	42.473	22.6	1		x			x				x
Bulgaria: Dzhurovo	42.967	24.05	2		x			x				x
Bulgaria: Ezero	42.763	25.363	5		x			x				x
Bulgaria: Fakia	42.233	27.13	1		x			x				x
Bulgaria: Gabrene	41.375	22.965	1		x			x				x
Bulgaria: Gaytaninovo	41.451	23.738	1		x			x				x
Bulgaria: Gintsi	43.033	23.132	1		x			x				x
Bulgaria: Golesh	43.046	22.947	1		x			x				x
Bulgaria: Iliya	42.075	22.797	1		x			x				x
Bulgaria: Kalotina	43	22.867	2		x			x				x
Bulgaria: Kamchya	42.9	26.933	4		x			x				x
Bulgaria: Karlovo	42.633	24.817	1		x			x				x
Bulgaria: Kazichene	42.667	23.4	2		x			x				x
Bulgaria: Kolarovo	41.355	23.126	1		x			x				x
Bulgaria: Kolets	41.86	25.318	1		x			x				x
Bulgaria: Kostenets	42.3	23.85	2		x			x				x
Bulgaria: Kykrina	43.107	24.865	1		x			x				x
Bulgaria: Levski	43.417	25.133	1		x			x				x
Bulgaria: Livade	41.4	23.61	1		x			x				x
Bulgaria: Lozenska Mt.	42.586	23.449	1		x			x				x
Bulgaria: Makotsevo	42.7	23.8	2		x			x				x
Bulgaria: Malko Popovo	41.604	25.9	1		x			x				x
Bulgaria: Malko Tarnovo	41.989	27.525	1		x			x				x
Bulgaria: Nisovo	43.655	26.085	5		x			x				x
Bulgaria: Novo Selo	42.177	22.679	1		x			x				x
Bulgaria: Orlovets	43.333	25.716	5		x			x				x
Bulgaria: Ostar Kamak	41.878	25.853	1		x			x				x
Bulgaria: Paril	41.435	23.69	1		x			x				x
Bulgaria: Petarch	42.844	23.147	1		x			x				x
Bulgaria: Primorsko	42.267	27.755	1		x			x				x
Bulgaria: Rakovski	42.267	24.967	1		x			x				x
Bulgaria: Razgrad	43.486	26.466	5		x			x				x
Bulgaria: Samokov	42.333	23.5	2		x			x				x
Bulgaria: Sapareva Banya	42.279	23.272	1		x			x				x
Bulgaria: Sedlovina	41.635	25.426	1		x			x				x
Bulgaria: Sevlievo	43.467	25.217	1		x			x				x
Bulgaria: Shezna	42.898	27.266	5		x			x				x
Bulgaria: Shumen	43.246	26.913	1		x			x				x
Bulgaria: Shumnatitsa	42.297	23.626	1		x			x				x
Bulgaria: Slivovo	42.209	26.994	1		x			x				x
Bulgaria: Slokoshtitsa	42.253	22.695	1		x			x				x
Bulgaria: Smochevo	42.15	23.1	2		x			x				x
Bulgaria: Stara Kresna	41.797	23.211	1		x			x				x
Bulgaria: Sungurlare	42.786	26.751	1		x			x				x
Bulgaria: Urvich	42.558	23.427	1		x			x				x
Bulgaria: Varbishka Mt.	42.933	26.683	1		x			x				x
Bulgaria: Varvara	42.103	27.89	5		x			x				x
Bulgaria: Zimevitsa	43.069	23.259	1		x			x				x
Bulgaria: Zlatni Pyasatsi	43.3	28.033	3		x			x				x
Bulgaria: Zverino	43.094	23.58	1		x			x				x
Greece: Alistrati	41.077	23.973	1		x			x				x
Greece: Ano Kaliniki	40.853	21.45	1	x			x			x
Greece: Asprangeli	39.825	20.725	1	x			x			x
Greece: Dafnochori	40.95	22.8	1		x			x				x
Greece: Elafotopos	39.9	20.669	1	x			x			x
Greece: Elati	39.835	20.74	1	x			x			x
Greece: Farmáki	40.367	20.85	17	x			x			x
Greece: Katratzides	41.12	26.148	1		x			x				x
Greece: Kentriko	41.167	22.9	1		x			x				x
Greece: Kerameia	39.562	22.081	1	x			x			x
Greece: Komotini	41.117	25.433	6		x			x				x
Greece: Kounoupena	39.684	19.764	1	x			x			x
Greece: Mylochori	41.106	22.9	1		x			x				x
Greece: Negrades	39.847	20.663	1	x			x			x
Greece: Paliambela	38.909	20.97	1	x			x			x
Greece: Pefkodasos	41.03	22.58	1	x			x	x		x	x
Greece: Prepsa	40.831	21.121	1	x			x			x
Greece: Saint Kosmas	41.084	24.669	1		x			x				x
Greece: Seli	40.567	22.022	1	x			x			x
Greece: Thessaloniki	40.633	22.95	6		x			x				x
Greece: Trilofos	40.358	22.477	1	x			x			x
Greece: Vasilitsa	40.055	21.07	18	x			x			x
Greece: Vryta	40.8	21.919	1	x			x			x
Greece: Zarkadia	41.018	24.646	1		x			x				x
Greece: Zygos-Mikro	39.823	21.261	1	x			x			x
Kosovo: Doganovic	42.216	21.189	1	x				x			x
Kosovo: Karagač	42.64	20.309	1	x			x			x
Kosovo: Kijevo	42.568	20.728	1	x			x	x		x	x
Kosovo: Novo Brdo	42.617	21.417	7	x				x			x
Kosovo: Prepolac	43.009	21.233	1	x				x			x
Kosovo: Pristina	42.666	21.172	1	x				x			x
Kosovo: Radevo	42.573	21.06	7	x				x			x
Kosovo: Xërze	42.341	20.573	1	x			x			x
Macedonia: Bansko	41.383	22.767	1		x			x				x
Macedonia: Berovo	41.717	22.867	7		x			x				x
Macedonia: Bigla	41.933	22.667	1		x			x				x
Macedonia: Debreste	41.502	21.293	1	x			x			x
Macedonia: Dojran	41.241	22.718	1	x				x			x
Macedonia: Ezerani	41.028	21.022	7	x			x			x
Macedonia: Garnikovo	41.277	22.06	1		x			x				x
Macedonia: Gorno Srpci	41.072	21.219	1	x			x			x
Macedonia: Gostivar	41.817	20.899	1	x			x			x
Macedonia: Karbinci	41.767	22.233	1	x				x			x
Macedonia: Kočani	41.933	22.4	8	x				x			x
Macedonia: Kolibari	41.58	20.951	1	x			x			x
Macedonia: Kostobačilo	41.05	20.8	7	x			x			x
Macedonia: Leskoec	40.962	20.885	1	x			x			x
Macedonia: Lesnovo	42.013	22.23	7	x				x			x
Macedonia: Loznani	41.221	21.446	1	x			x			x
Macedonia: Mislesevo	41.185	20.709	7	x			x			x
Macedonia: Mitrašinci	41.75	22.767	1		x			x				x
Macedonia: Petrovec	41.939	21.615	1	x				x			x
Macedonia: Prilep	41.419	21.611	1	x			x			x
Macedonia: Probistip	41.983	22.167	1	x				x			x
Macedonia: Rugince	42.148	21.977	1	x				x			x
Macedonia: Visoka Čuka	41.286	22.326	7		x			x				x
Macedonia: Vrbjani	41.413	20.816	1	x			x			x
Montenegro: Bjeloši	42.374	18.907	1	x			x			x
Montenegro: Doni Štoj	41.9	19.329	1	x			x			x
Montenegro: Erakovice	42.537	19.035	19	x			x			x
Montenegro: Jankovića Krš	42.384	19.03	19	x			x			x
Montenegro: Kućišta	42.46	18.854	1	x			x			x
Montenegro: Smrdan	42.445	19.166	19	x			x			x
Montenegro: Ubao	42.467	19.354	19	x			x			x
Serbia: Aranđelovac	44.284	20.669	1		x			x				x
Serbia: Belanovica	44.233	20.4	8		x			x				x
Serbia: Berovacko jezero	43.027	22.6	1		x			x				x
Serbia: Blato	43.301	20.73	1	x				x			x
Serbia: Borovsko polje	42.97	22.721	1		x			x				x
Serbia: Delimedje	43.091	20.265	1	x				x			x
Serbia: Divcibare	44.1	19.933	1	x				x			x
Serbia: Dojni Dusnik	43.159	22.127	1	x				x			x
Serbia: Drežnik	43.774	19.992	1	x				x			x
Serbia: Gornja Sabanta	43.9	21	1		x			x				x
Serbia: Gornji Varbes	43.204	21.963	1	x				x			x
Serbia: Grcak	43.467	20.95	1	x				x			x
Serbia: Grdelica	42.874	22.066	7	x				x			x
Serbia: Grivac	43.967	20.667	1		x			x				x
Serbia: Grza	43.897	21.646	1		x			x				x
Serbia: Guberevac	43.852	20.771	1		x			x				x
Serbia: Jezero	43.583	21.9	1		x			x				x
Serbia: Jezero Ploce	43.283	22.142	1	x				x			x
Serbia: Karan	43.888	19.926	1	x				x			x
Serbia: Kesino Jezero	42.786	22.245	7	x				x			x
Serbia: Ljubovija	44.2	19.4	1	x				x			x
Serbia: Lucane	42.417	21.717	1	x				x			x
Serbia: Pcinja	42.33	21.9	20	x				x			x
Serbia: Preševo	42.306	21.656	7	x				x			x
Serbia: Promaja	42.678	22.357	1	x				x			x
Serbia: Rataje	43.477	21.106	1	x				x			x
Serbia: Resavica Pecina	44.05	21.6	1		x			x				x
Serbia: Sisevac	43.957	21.585	1		x			x				x
Serbia: Stanisinci	43.517	20.883	1	x				x			x
Serbia: Todorovce	42.875	21.866	1	x				x			x
Serbia: Trešnja	44.6	20.583	1		x			x				x
Serbia: Vitanovac	43.733	20.8	1		x			x				x
Serbia: Vlasi	42.999	22.638	1		x			x				x
Serbia: Vranje	42.606	21.856	1	x				x			x
Serbia: Zli Do	42.422	22.453	1		x			x				x
Turkey: Abanta Gölu	40.607	31.286	1			x		x	x				x	x
Turkey: Adapazari	40.767	30.483	1			x		x	x				x	x
Turkey: Arifiye	40.693	30.37	1			x		x					x
Turkey: Aşağıçaylı	41.933	33.767	9			x			x					x
Turkey: Babeski	41.433	27.083	9		x			x				x
Turkey: Baçeköy Merkez	41.172	28.988	9		x			x				x
Turkey: Bahçesultan Köyü-Pazaryeri	40.034	29.759	1			x		x					x
Turkey: Bartın	41.617	32.333	1			x			x					x
Turkey: Bergama	39.021	27.107	1		x			x				x
Turkey: Biga	40.233	27.233	10		x			x				x
Turkey: Bigadiç	39.351	28.217	1		x			x				x
Turkey: Bolu	40.7	31.467	12			x			x					x
Turkey: Bozdağ	38.367	28.102	1		x			x				x
Turkey: Buldan	38.067	28.783	9		x			x				x
Turkey: Büyük Kalecik	38.687	30.455	1		x			x				x
Turkey: Çan	40.006	26.937	1		x			x				x
Turkey: Çavuşköy	40.255	28.107	1		x			x				x
Turkey: Cebeci	41.201	34.036	1			x			x					x
Turkey: Çorlu	41.167	27.783	9		x			x				x
Turkey: Demirbey	40.856	30.488	1			x		x					x
Turkey: Demirköy	41.817	27.767	9		x			x				x
Turkey: Dikili	39.176	26.822	1		x			x				x
Turkey: Dranaz pass	41.607	34.834	14			x			x					x
Turkey: Düzce	40.85	30.983	12			x			x					x
Turkey: Efes	37.947	27.349	1		x			x				x
Turkey: Erbaa	40.7	36.617	16			x			x					x
Turkey: Ezine	39.784	26.334	9		x			x				x
Turkey: Gebze	40.89	29.504	1			x		x					x
Turkey: Gönen	40.217	27.618	1		x			x				x
Turkey: Gürbulak	40.967	39.627	1			x			x					x
Turkey: Habibler	41.133	28.833	10		x			x				x
Turkey: Hacılar	41.491	32.101	1			x			x					x
Turkey: Hadımköy	41.137	28.589	1		x			x				x
Turkey: Halkali	41.033	28.767	1		x			x				x
Turkey: Hayrabolu	41.21	27.051	1		x			x				x
Turkey: İznik	40.423	29.733	10			x		x					x
Turkey: Kalecik	40.077	33.341	1			x			x					x
Turkey: Karabük	41.133	32.617	11			x			x					x
Turkey: Karacabey	40.25	28.3	1		x			x				x
Turkey: Karakoç	41.487	32.142	1			x			x					x
Turkey: Karasu	41.076	30.757	1			x			x					x
Turkey: Kavak	41.11	36.017	1			x			x					x
Turkey: Keşan	40.917	26.633	1		x			x				x
Turkey: Kirazlıyayla	40.1114	29.051	1			x		x					x
Turkey: Klaros	38	27.183	1		x			x				x
Turkey: Korgan	40.833	37.35	10			x			x					x
Turkey: Koyulhisar	40.3	37.83	9			x			x					x
Turkey: Kula	38.55	28.65	10		x			x				x
Turkey: Kuşçular	41.583	35.867	11			x			x					x
Turkey: Kuşçular Köyü	41.067	35.4	28			x			x					x
Turkey: Lake Sülüklü	38.565	27.533	13		x			x				x
Turkey: Lapseki	40.345	26.688	9		x			x				x
Turkey: Lüleburgaz	41.4	27.35	9		x			x				x
Turkey: Mekece	40.45	30.05	14			x		x					x
Turkey: Mersinbeleni	37.65	27.683	1		x			x				x
Turkey: Mustafa Kemalpaşa	40.069	28.352	1		x			x				x
Turkey: Niksar	40.583	36.95	9			x			x					x
Turkey: Okluca	40.224	29.852	1			x		x					x
Turkey: Orhangazi	40.554	29.325	1			x		x					x
Turkey: Pehlivanköy	41.367	26.967	9		x			x				x
Turkey: Reşadiye	40.441	37.476	1			x			x					x
Turkey: Safibey	40.485	30.239	1			x		x					x
Turkey: Saray	41.45	27.917	9		x			x				x
Turkey: Sarayiçi	41.683	26.55	9		x			x				x
Turkey: Seben	40.584	31.637	1			x		x	x				x	x
Turkey: Şebinkarahisar	40.286	38.126	1			x			x					x
Turkey: Şerefiye	40.15	37.767	16			x			x					x
Turkey: Seydiler	41.7	33.7	9			x			x					x
Turkey: Şile	41.167	29.617	10			x		x					x
Turkey: Suşehri	40.163	38.095	9			x			x					x
Turkey: Taşlıyayla	40.6	31.683	10			x			x					x
Turkey: Tokat	40.333	36.583	16			x			x					x
Turkey: Tosya	41.017	34.033	9			x			x					x
Turkey: Ulubey	40.867	37.75	10			x			x					x
Turkey: Uzunköprü	41.267	26.683	9		x			x				x
Turkey: Yakacık	40.917	29.2	1			x		x					x
Turkey: Yamanlar Dagi	38.533	27.233	11		x			x				x
Turkey: Yenişehir	40.268	29.605	1			x		x					x
Turkey: Yomra	40.868	39.857	1			x			x					x
				127	127	45	89	183	32	89	40	127	16	32
References:
1: Personal database
2: Tzankov, N. &, Stoyanov, A. (2008) Triturus cristatus (Laurenti, 1768): a new species for Bulgaria from its southernmost known localities. Salamandra, 44, 153-161.
3: Gherghel, I. & Iftime, A. (2009) On the presence of the Danube crested newt, Triturus dobrogicus, at Durankulak Lake, Bulgaria. North-Western Journal of Zoology, 5, 209-213.
4: Litvinchuk, S. N. & Borkin, L. J. (2009) Evolution, systematic and distribution of crested newts (Triturus cristatus complex) in Russia and adjacent countries. Evropeisky Dom Press, St. Petersburg.
5: N. Tzankov (in litt.)
6: Sotiropoulos, K., Legakis, A. & Polymeni, R.-M. (1995) A review of the knowledge on the distribution of the genus Triturus (Rafinesque, 1815) in Greece (Caudata: Salamandridae). Herpetozoa, 8, 25-34.
7: Collection University of Belgrade
8: Arntzen, J. W. (2003) Triturus cristatus Superspecies-Kammolch-Artenkreis. Handbuch der Reptilien und Amphibien Europas. Schwanzlurche IIA (ed. by K. Grossenbacher and B. Thiesmeier), pp. 421-514. Aula-Verlag, Wiebelsheim.
9: Collection Adnan Menderes University
10: Özeti, N. & Yilmaz, I. (1994) Tiirkiye Amfibiliri. The Amphibians of Turkey. Izmir.
11: Schmidler, J. J. & Schmidtler, J. F. (1967) Über die Verbreitung der Molchgattung Triturus in Kleinasien. Salamandra, 3, 15-35.
12: Sparreboom, M. & Arntzen, J. W. (1987) Über die Amphibien in der Umgebung von Adapazari, Türkei. Herpetofauna, 9, 27-34.
13: Çiçek, K. & Ayaz, D. (2011) New data on facultive paedomorphism of the smooth newt, Lissotriton vulgaris, in Western Anatolia, Turkey. Journal of Freshwater Ecology, 26, 99-103.
14: J.F. Schmidtler (in litt.)
15: I. Haxhiu (in litt.)
16: Arntzen, J. W. & Wallis, G. P. (1999) Geographic variation and taxonomy of crested newts (Triturus cristatus superspecies): Morphological and mitochondrial data. Contributions to Zoology, 68, 181-203.
17: Denoël M (2004) Distribution and characteristics of aquatic habitats of newts and Yellow-bellied Toads in the district of Ioannina (Epirus, Greece). Herpetozoa 17: 49-64.
18: K. Sotiropoulos (in litt.)
19: Ćirović R, Vukov TD, Radović D, Džukić G, Kalezić ML (2008) Distribution patterns and environmental determinants of European newts in the Montenegrin karst area. Biologia 63: 745-752.
20: J. Crnobrnja-Isailović (in litt.)
28: Demirsoy, A. (1996) Tiikiye Omurglilari, Amfibiler. Meteksan, Ankara.
* Note that in some populations two mtDNA types are found in syntopy.
For details on range sections see Fig. 2
